# Supplementary material
Source: HighWire-hosted journal article supplement (http://rc.rcjournal.com/highwire/filestream/25885/field_highwire_adjunct_files/0/RC-01344.R2_Bourdin_Suppl.pdf)
Supplement: RC-01344.R2_Bourdin_Suppl.pdf [file RC-01344.R2_Bourdin_Suppl.pdf]

Supplementary Fig. 1. Relationship of inspiratory volume to inspiratory maximal measured pressure in the C30R5 condition (compliance of 30 mL/cm H<sub>2</sub>O and resistance of 5 cm H<sub>2</sub>O/L/s) with CoughAssist and Alpha 200 in the control condition (reference) and in the presence of endotracheal tube (ETT) or tracheostomy cannula. The lines are the regression lines for each artificial airway.

Supplementary Fig. 2. Relationship of inspiratory volume to inspiratory maximal measured pressure in the C30R5 condition (compliance of 60 mL/cm H<sub>2</sub>O and resistance of 5 cm H<sub>2</sub>O/L/s) with CoughAssist and Alpha 200 in the control condition (reference) and in the presence of endotracheal tube (ETT) or tracheostomy cannula. The lines are the regression lines for each artificial airway.

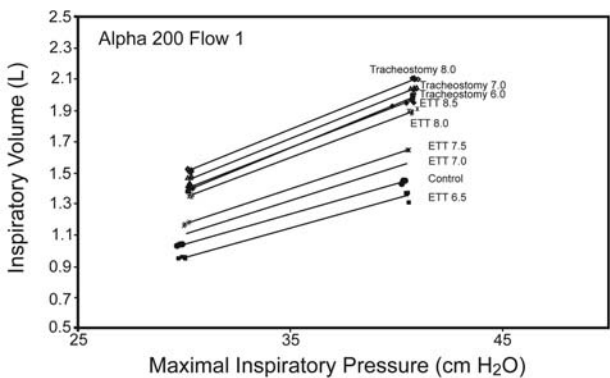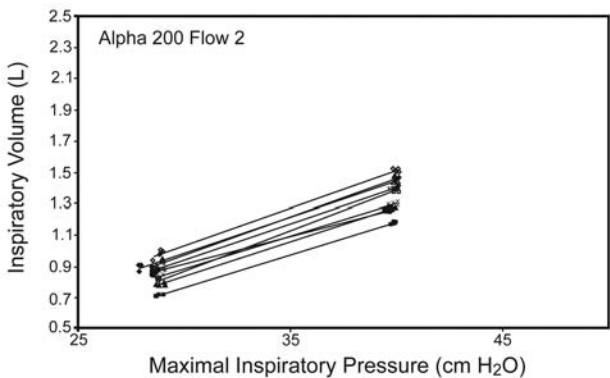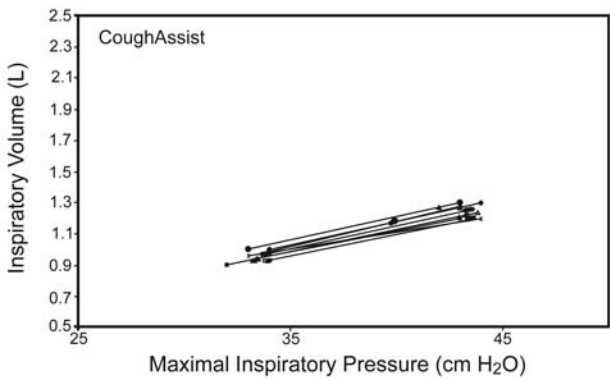

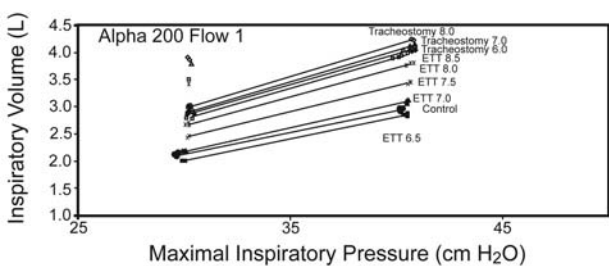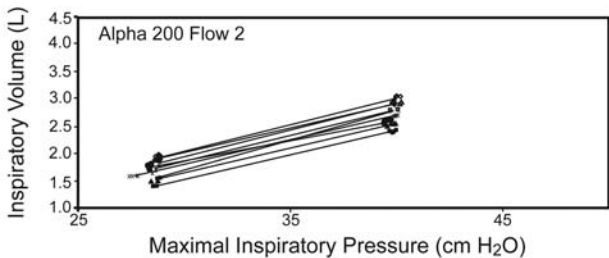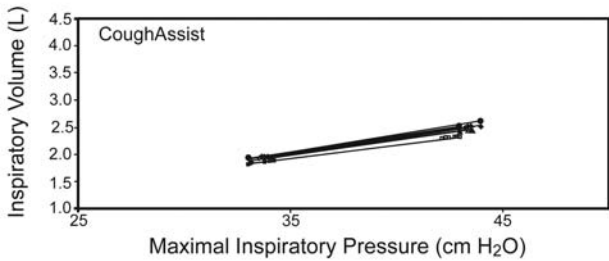

Table 1 ESM. Values of estimates of coefficients of the linear regression between inspired volume and maximal inspiratory pressure in 2 mechanical conditions between Alpha 200 and Cough Assist without artificial airways.

| Coefficients                                                                                                                                                             | C30R5              | C60R5             |
|--------------------------------------------------------------------------------------------------------------------------------------------------------------------------|--------------------|-------------------|
| Cough Assist vs. Alpha 200 flow 1                                                                                                                                        |                    |                   |
| Intercept with Alpha 200 (L)                                                                                                                                             | 1.277 (0.001) ***  | 2.595 (0.003) *** |
| Slope with Alpha 200 (L.cmH <sub>2</sub> O <sup>-1</sup> )                                                                                                               | 0.039 (0.0001) *** | 0.078 (0.001) *** |
| Deviation of intercept with cough assist (L)                                                                                                                             | -0.187 (0.002) †   | -0.507 (0.004) †  |
| Deviation of slope with cough assist (L.cmH <sub>2</sub> O <sup>-1</sup> )                                                                                               | -0.009 (0.0001) †  | -0.015 (0.001) †  |
| Cough Assist vs. Alpha 200 flow 2                                                                                                                                        |                    |                   |
| Intercept with Alpha 200 (L)                                                                                                                                             | 1.131 (0.002) ***  | 2.297 (0.004) *** |
| Slope with Alpha 200 (L.cmH <sub>2</sub> O <sup>-1</sup> )                                                                                                               | 0.036 (0.0001) *** | 0.074 (0.001) *** |
| Deviation of intercept with cough assist (L)                                                                                                                             | -0.041 (0.002) †   | -0.208 (0.006) †  |
| Deviation of slope with cough assist (L.cmH <sub>2</sub> O <sup>-1</sup> )                                                                                               | -0.006 (0.0001) †  | -0.011 (0.001) †  |
| The intercept is the inspired volume at a pressure of 36 cm H <sub>2</sub> O.<br>Values are mean (standard error)<br>† P < 0.001 vs. other device *** P < 0.001 vs. zero |                    |                   |

Table 2 ESM. Values of the estimates of the coefficients of the linear regression analysis between inspired volume and maximal inspiratory pressure across the fixed effects of device (Cough Assist vs. Alpha 200 at each Flow) and artificial airways (presence vs. absence) in the C30 R5 condition.

| Effect                                                 | Coefficients                                             | mean   | SE    |
|--------------------------------------------------------|----------------------------------------------------------|--------|-------|
| Reference = Alpha 200 Flow 1 with no artificial airway | Intercept (L) *                                          | 1.277  | 0.047 |
|                                                        | Slope (L.cmH <sub>2</sub> O <sup>-1</sup> ) *            | 0.039  | 0.009 |
| Effect of Cough Assist Relative to reference           | Deviation of Intercept (L) ††                            | -0.188 | 0.069 |
|                                                        | Deviation of slope (L.cmH <sub>2</sub> O <sup>-1</sup> ) | -0.009 | 0.013 |
| Effect of artificial airways Relative to reference     | Deviation of Intercept (L) †††                           | 0.310  | 0.050 |
|                                                        | Deviation of slope (L.cmH <sub>2</sub> O <sup>-1</sup> ) | 0.012  | 0.009 |
| Effect of artificial airways Relative to Cough Assist  | Deviation of Intercept (L) †††                           | -0.369 | 0.073 |
|                                                        | Deviation of Slope (L.cmH <sub>2</sub> O <sup>-1</sup> ) | -0.013 | 0.014 |

  

| Effect                                                 | Coefficients                                               | mean   | SE    |
|--------------------------------------------------------|------------------------------------------------------------|--------|-------|
| Reference = Alpha 200 Flow 2 with no artificial airway | Intercept (L) *                                            | 1.131  | 0.022 |
|                                                        | Slope (L.cmH <sub>2</sub> O <sup>-1</sup> ) *              | 0.036  | 0.004 |
| Effect of Cough Assist Relative to reference           | Deviation of Intercept (L)                                 | -0.041 | 0.032 |
|                                                        | Deviation of slope (L.cmH <sub>2</sub> O <sup>-1</sup> )   | -0.006 | 0.006 |
| Effect of artificial airways Relative to reference     | Deviation of Intercept (L) †                               | 0.059  | 0.024 |
|                                                        | Deviation of slope (L.cmH <sub>2</sub> O <sup>-1</sup> ) † | 0.010  | 0.004 |
| Effect of artificial airways Relative to Cough Assist  | Deviation of Intercept (L) †††                             | -0.119 | 0.034 |
|                                                        | Deviation of Slope (L.cmH <sub>2</sub> O <sup>-1</sup> )   | -0.012 | 0.006 |

SE = standard error  
 \* P < 0.001 as compared to zero † P < 0.05 †† P < 0.001 ††† P < 0.0001 relative to reference

Table 3 ESM. Values of the estimates of the coefficients of the linear regression analysis between inspired volume and maximal inspiratory pressure across the fixed effects of device (Cough Assist vs. Alpha 200 at each Flow) and artificial airways (presence vs. absence) in the C60 R5 condition.

| Effect                                                 | Coefficients                                             | mean   | SE    |
|--------------------------------------------------------|----------------------------------------------------------|--------|-------|
| Reference = Alpha 200 Flow 1 with no artificial airway | Intercept (L) *                                          | 2.595  | 0.090 |
|                                                        | Slope (L.cmH <sub>2</sub> O <sup>-1</sup> ) *            | 0.078  | 0.017 |
| Effect of Cough Assist Relative to reference           | Deviation of Intercept (L) ††                            | -0.507 | 0.133 |
|                                                        | Deviation of slope (L.cmH <sub>2</sub> O <sup>-1</sup> ) | -0.015 | 0.023 |
| Effect of artificial airways Relative to reference     | Deviation of Intercept (L) †††                           | 0.619  | 0.096 |
|                                                        | Deviation of slope (L.cmH <sub>2</sub> O <sup>-1</sup> ) | 0.027  | 0.018 |
| Effect of artificial airways Relative to Cough Assist  | Deviation of Intercept (L) †††                           | -0.682 | 0.141 |
|                                                        | Deviation of Slope (L.cmH <sub>2</sub> O <sup>-1</sup> ) | -0.035 | 0.025 |

  

| Effect                                                 | Coefficients                                                | mean   | SE    |
|--------------------------------------------------------|-------------------------------------------------------------|--------|-------|
| Reference = Alpha 200 Flow 2 with no artificial airway | Intercept (L) *                                             | 2.297  | 0.044 |
|                                                        | Slope (L.cmH <sub>2</sub> O <sup>-1</sup> ) *               | 0.074  | 0.007 |
| Effect of Cough Assist Relative to reference           | Deviation of Intercept (L) †                                | -0.208 | 0.063 |
|                                                        | Deviation of slope (L.cmH <sub>2</sub> O <sup>-1</sup> )    | -0.011 | 0.011 |
| Effect of artificial airways Relative to reference     | Deviation of Intercept (L)                                  | 0.087  | 0.046 |
|                                                        | Deviation of slope (L.cmH <sub>2</sub> O <sup>-1</sup> ) †  | 0.022  | 0.008 |
| Effect of artificial airways Relative to Cough Assist  | Deviation of Intercept (L) †                                | -0.150 | 0.066 |
|                                                        | Deviation of Slope (L.cmH <sub>2</sub> O <sup>-1</sup> ) †† | -0.030 | 0.011 |

SE = standard error  
 \* P < 0.001 as compared to zero † P < 0.05 †† P < 0.001 ††† P < 0.0001 relative to reference

Table 4 ES M. Coefficients (intercept and slope) of the linear regression analysis pertaining to inspired volume to maximal inspiratory pressure across the fixed effects of device (Cough Assist vs. Alpha 200 flow 1) and artificial airways (every size) in the C30 R5 condition.

| Effect                                                                 | Coefficients                                                           | Mean   | SE    |
|------------------------------------------------------------------------|------------------------------------------------------------------------|--------|-------|
| Reference = Alpha 200 flow 1 with no artificial airways                | Intercept (L) ***                                                      | 1.277  | 0.003 |
|                                                                        | Slope (L.cmH <sub>2</sub> O <sup>-1</sup> ) ***                        | 0.039  | 0.001 |
| Effect of cough assist relative to the reference                       | Deviation of intercept (L) †††                                         | -0.187 | 0.004 |
|                                                                        | Deviation of slope (L.cmH <sub>2</sub> O <sup>-1</sup> ) †††           | -0.009 | 0.001 |
|                                                                        | ETT 8.5 Deviation of intercept (L) †††                                 | 0.439  | 0.004 |
|                                                                        | ETT 8.0 Deviation of intercept (L) †††                                 | 0.373  | 0.004 |
| Effect of artificial airways on the intercept of the reference         | ETT 7.5 Deviation of intercept (L) †††                                 | 0.166  | 0.004 |
|                                                                        | ETT 7.0 Deviation of intercept (L) †††                                 | 0.087  | 0.004 |
|                                                                        | ETT 6.5 Deviation of intercept (L)                                     | -0.092 | 0.004 |
|                                                                        | TRACH 8.0 Deviation of intercept (L) †††                               | 0.558  | 0.004 |
|                                                                        | TRACH 7.0 Deviation of intercept (L) †††                               | 0.441  | 0.004 |
|                                                                        | TRACH 6.0 Deviation of intercept (L) †††                               | 0.508  | 0.007 |
|                                                                        | ETT 8.5 Deviation of slope (L.cmH <sub>2</sub> O <sup>-1</sup> ) †††   | 0.014  | 0.001 |
|                                                                        | ETT 8.0 Deviation of slope (L.cmH <sub>2</sub> O <sup>-1</sup> ) †††   | 0.013  | 0.001 |
|                                                                        | ETT 7.5 Deviation of slope (L.cmH <sub>2</sub> O <sup>-1</sup> ) †††   | 0.007  | 0.001 |
|                                                                        | ETT 7.0 Deviation of slope (L.cmH <sub>2</sub> O <sup>-1</sup> ) †††   | 0.005  | 0.001 |
|                                                                        | ETT 6.5 Deviation of slope (L.cmH <sub>2</sub> O <sup>-1</sup> ) †††   | 0.007  | 0.001 |
|                                                                        | TRACH 8.0 Deviation of slope (L.cmH <sub>2</sub> O <sup>-1</sup> ) ††† | 0.016  | 0.001 |
|                                                                        | TRACH 7.0 Deviation of slope (L.cmH <sub>2</sub> O <sup>-1</sup> ) ††† | 0.016  | 0.001 |
|                                                                        | TRACH 6.0 Deviation of slope (L.cmH <sub>2</sub> O <sup>-1</sup> ) ††† | 0.018  | 0.001 |
| Effect of artificial airways on the intercept of Cough Assist          | ETT 8.5 Deviation of intercept (L) †††                                 | -0.469 | 0.006 |
|                                                                        | ETT 8.0 Deviation of intercept (L) †††                                 | -0.437 | 0.006 |
|                                                                        | ETT 7.5 Deviation of intercept (L) †††                                 | -0.196 | 0.006 |
|                                                                        | ETT 7.0 Deviation of intercept (L) †††                                 | -0.126 | 0.006 |
|                                                                        | ETT 6.5 Deviation of intercept (L)                                     | -0.011 | 0.006 |
|                                                                        | TRACH 8.0 Deviation of intercept (L) †††                               | -0.610 | 0.006 |
|                                                                        | TRACH 7.0 Deviation of intercept (L) †††                               | -0.575 | 0.006 |
|                                                                        | TRACH 6.0 Deviation of intercept (L) †††                               | -0.544 | 0.006 |
|                                                                        | ETT 8.5 Deviation of slope (L.cmH <sub>2</sub> O <sup>-1</sup> ) †††   | -0.014 | 0.001 |
|                                                                        | ETT 8.0 Deviation of slope (L.cmH <sub>2</sub> O <sup>-1</sup> ) †††   | -0.021 | 0.001 |
|                                                                        | ETT 7.5 Deviation of slope (L.cmH <sub>2</sub> O <sup>-1</sup> ) †††   | -0.007 | 0.001 |
|                                                                        | ETT 7.0 Deviation of slope (L.cmH <sub>2</sub> O <sup>-1</sup> ) †     | -0.002 | 0.001 |
|                                                                        | ETT 6.5 Deviation of slope (L.cmH <sub>2</sub> O <sup>-1</sup> )       | -0.002 | 0.001 |
|                                                                        | TRACH 8.0 Deviation of slope (L.cmH <sub>2</sub> O <sup>-1</sup> ) ††† | -0.017 | 0.001 |
| TRACH 7.0 Deviation of slope (L.cmH <sub>2</sub> O <sup>-1</sup> ) ††† | -0.017                                                                 | 0.001  |       |
| TRACH 6.0 Deviation of slope (L.cmH <sub>2</sub> O <sup>-1</sup> ) ††† | -0.020                                                                 | 0.001  |       |

ETT=endotracheal tube; TRACH=tracheotomy canula.

\*\*\* P < 0.0001 vs. zero.

† P < 0.05

††† P < 0.0001 vs. reference
